# Supplementary material for: Novel Parvoviruses from Wild and Domestic Animals in Brazil Provide New Insights into Parvovirus Distribution and Diversity
Source: MDPI journal article supplement (doi:10.3390/v10040143), 2018-03-22
Supplement: s1 [file s1]

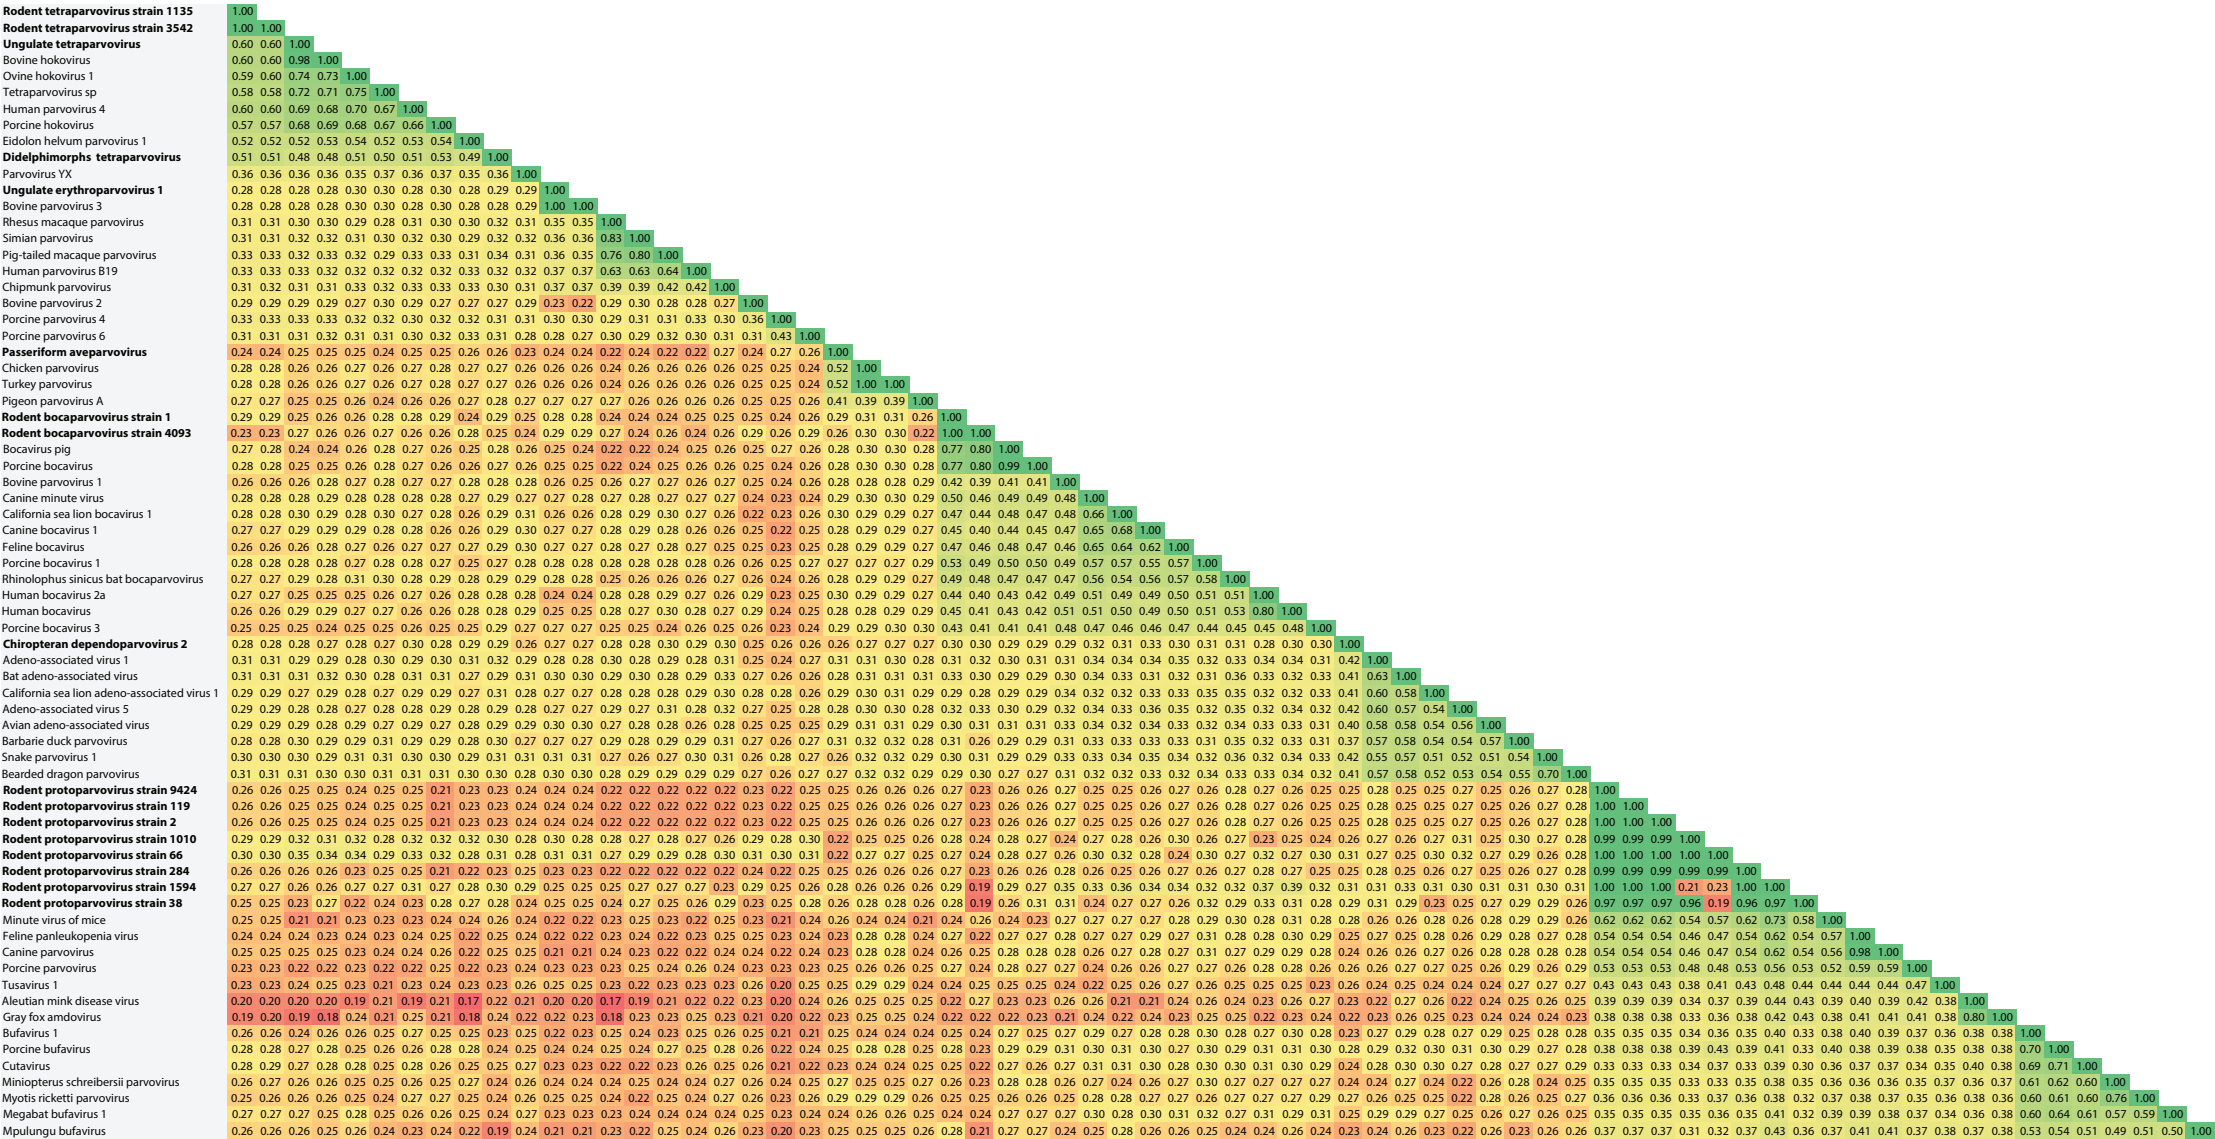

|                                              |  |
|----------------------------------------------|--|
| Rodent tetraparvovirus strain 1135           |  |
| Rodent tetraparvovirus strain 3542           |  |
| Ungulate tetraparvovirus                     |  |
| Bovine hokovirus                             |  |
| Ovine hokovirus 1                            |  |
| Tetraparvovirus sp                           |  |
| Human parvovirus 4                           |  |
| Porcine hokovirus                            |  |
| Eidolon helvum parvovirus 1                  |  |
| Didelphimorphs tetraparvovirus               |  |
| Parvovirus YX                                |  |
| Ungulate erythroparvovirus 1                 |  |
| Bovine parvovirus 3                          |  |
| Rhesus macaque parvovirus                    |  |
| Simian parvovirus                            |  |
| Pig-tailed macaque parvovirus                |  |
| Human parvovirus B19                         |  |
| Chipmunk parvovirus                          |  |
| Bovine parvovirus 2                          |  |
| Porcine parvovirus 4                         |  |
| Porcine parvovirus 6                         |  |
| Passeriform aveparvovirus                    |  |
| Chicken parvovirus                           |  |
| Turkey parvovirus                            |  |
| Pigeon parvovirus A                          |  |
| Rodent bocaparvovirus strain 1               |  |
| Rodent bocaparvovirus strain 4093            |  |
| Bocavirus pig                                |  |
| Porcine bocavirus                            |  |
| Bovine parvovirus 1                          |  |
| Canine minute virus                          |  |
| California sea lion bocavirus 1              |  |
| Canine bocavirus 1                           |  |
| Feline bocavirus                             |  |
| Porcine bocavirus 1                          |  |
| Rhinolophus sinicus bat bocaparvovirus       |  |
| Human bocavirus 2a                           |  |
| Human bocavirus                              |  |
| Porcine bocavirus 3                          |  |
| Chiropteran dependoparvovirus 2              |  |
| Adeno-associated virus 1                     |  |
| Bat adeno-associated virus                   |  |
| California sea lion adeno-associated virus 1 |  |
| Adeno-associated virus 5                     |  |
| Avian adeno-associated virus                 |  |
| Barbarie duck parvovirus                     |  |
| Snake parvovirus 1                           |  |
| Bearded dragon parvovirus                    |  |
| Rodent protoparvovirus strain 9424           |  |
| Rodent protoparvovirus strain 119            |  |
| Rodent protoparvovirus strain 2              |  |
| Rodent protoparvovirus strain 1010           |  |
| Rodent protoparvovirus strain 66             |  |
| Rodent protoparvovirus strain 284            |  |
| Rodent protoparvovirus strain 1594           |  |
| Rodent protoparvovirus strain 38             |  |
| Minute virus of mice                         |  |
| Feline panleukopenia virus                   |  |
| Canine parvovirus                            |  |
| Porcine parvovirus                           |  |
| Tusavirus 1                                  |  |
| Aleutian mink disease virus                  |  |
| Gray fox amdovirus                           |  |
| Bufovirus 1                                  |  |
| Porcine bufovirus                            |  |
| Cutavirus                                    |  |
| Miniopterus schreibersii parvovirus          |  |
| Myotis ricketti parvovirus                   |  |
| Megabat bufovirus 1                          |  |
| Mpungu bufovirus                             |  |
