# Supplementary figures and images for: Novel Parvoviruses from Wild and Domestic Animals in Brazil Provide New Insights into Parvovirus Distribution and Diversity
Source: MDPI journal article supplement (doi:10.3390/v10040143), 2018-03-22

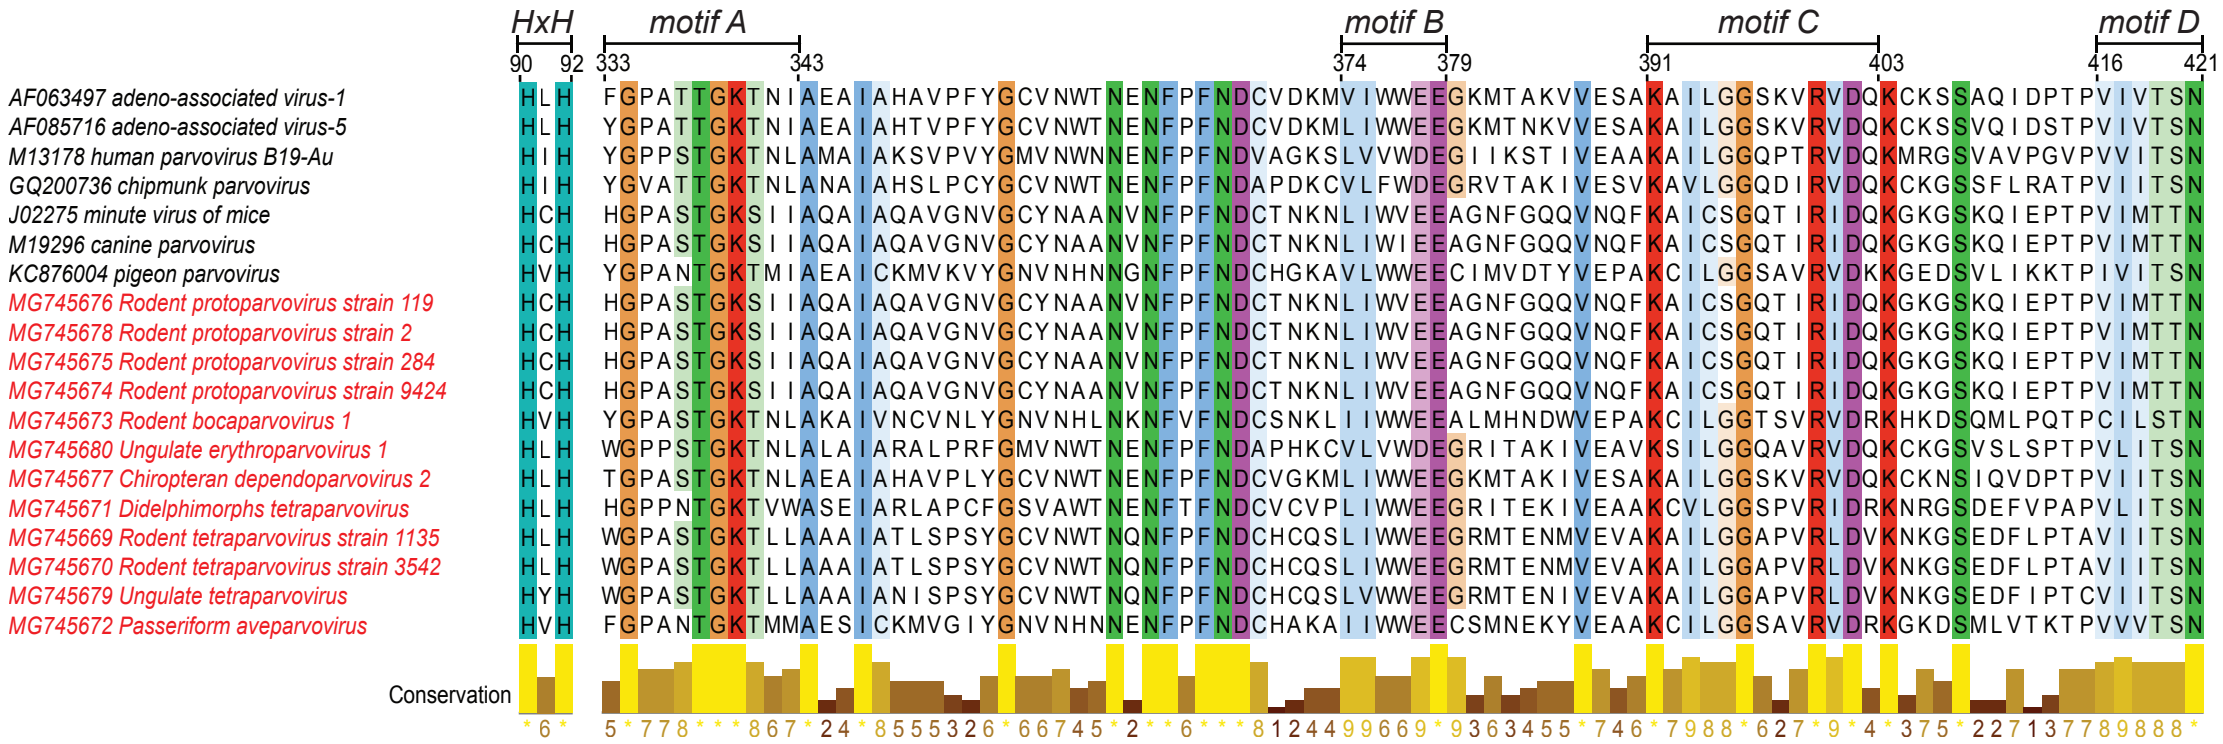

Supplement: s1 [file s1]
